# Supplementary material for: Supramolecular nanotubes constructed from 3d–4f heterometallic sandwiched polyoxotungstate dimers
Source: Royal Society of Chemistry journal article supplement (doi:10.1039/c6ce00755d), 2016-01-01
Supplement: c6ce00755d1.pdf [file c6ce00755d1.pdf]

## ESI

# Supramolecular Nanotube Constructed from 3d-4f Heterometallic Sandwiched Polyoxotungstate Dimers

Han Xue,<sup>a</sup> Zhong Zhang,<sup>a</sup> Rui Pan,<sup>a</sup> Bai-Feng Yang,<sup>a</sup> Hong-Sheng Liu,<sup>\*c</sup> and Guo-Yu Yang <sup>\*ab</sup>

<sup>a</sup>*MOE Key Laboratory of Cluster Science, School of Chemistry, Beijing Institute of Technology, Beijing 100081, China*

<sup>b</sup>*Department of Chemistry, Key Laboratory for Preparation and Application of Ordered Structural Materials of Guangdong Province, Shantou University, Shantou, Guangdong 515063, China*

<sup>c</sup>*College of Chemical Engineering, Daqing Normal University; Key Laboratory of Oilfield Applied chemistry, College of Heilongjiang Province, Daqing, Heilongjiang 163712, China.*

**Table S1.** Bond Valence Sum (BVS) Calculations of All W, Fe and Ln Atoms in **1-4**.

**Table S2.** Variation of Ln–O Bond Lengths with the atomic number in **1-4**.

**Figure S1** Comparison of the simulated and experimental PXRD patterns of **1-4**.

**Figure S2** The IR spectrum of **1-4**.

**Figure S3** UV-Vis plots of Kunelka-Munk function versus energy  $E$  (eV) of **1a**, **2b**, **3c**, **4d**.

**Figure S4** The TG curve of **1-4**.

**Figure S5** Coloration change of compound **1-3** after 0-330 min of UV irradiation with a 300 W xenon lamp.

**Table S1.** Bond Valence Sum (BVS) Calculations of All W, Fe and Ln Atoms in **1–4**.

| 1-BVS |      |     |      | 2-BVS |      |     |      | 3-BVS |      | 4-BVS |      |
|-------|------|-----|------|-------|------|-----|------|-------|------|-------|------|
| Ln1   | 3.24 | W10 | 5.29 | Ln1   | 2.95 | W10 | 6.46 | Ln1   | 3.26 | Ln1   | 2.98 |
| Fe1   | 3.08 | W11 | 6.35 | Fe1   | 3.14 | W11 | 6.14 | Fe1   | 3.23 | Fe1   | 3.06 |
| Fe2   | 3.11 | W12 | 6.31 | Fe2   | 3.13 | W12 | 6.28 | W1    | 6.03 | W1    | 6.02 |
| W1    | 6.09 | W13 | 6.44 | W1    | 5.93 | W13 | 6.22 | W2    | 5.95 | W2    | 6.18 |
| W2    | 5.81 | W14 | 6.15 | W2    | 6.33 | W14 | 6.17 | W3    | 6.40 | W3    | 6.36 |
| W3    | 5.99 | W15 | 6.11 | W3    | 6.28 | W15 | 5.97 | W4    | 6.10 | W4    | 6.11 |
| W4    | 5.80 | W16 | 5.93 | W4    | 6.14 | W16 | 5.93 | W5    | 5.91 | W5    | 6.15 |
| W5    | 6.34 | W17 | 6.47 | W5    | 6.06 | W17 | 5.93 | W6    | 6.09 | W6    | 5.61 |
| W6    | 5.62 | W18 | 5.06 | W6    | 6.05 | W18 | 5.90 | W7    | 5.65 | W7    | 5.85 |
| W7    | 6.47 | W19 | 6.07 | W7    | 6.13 | W19 | 6.21 | W8    | 5.66 | W8    | 6.14 |
| W8    | 5.33 | W20 | 5.94 | W8    | 6.19 | W20 | 6.18 | W9    | 5.95 | W9    | 5.91 |
| W9    | 5.94 |     |      | W9    | 6.20 |     |      | W10   | 5.89 | W10   | 5.85 |

**Table S2.** Variation of Ln–O Bond Lengths with the atomic number in **1–4**.

| Compounds <sub>atomic number</sub>  | Range of Ln–O Lengths ( Å ) | Average Ln–O lengths ( Å ) |
|-------------------------------------|-----------------------------|----------------------------|
| 1(La <sup>III</sup> ) <sub>57</sub> | 2.47(2)-2.589(18)           | 2.526                      |
| 2(Ce <sup>III</sup> ) <sub>58</sub> | 2.458(15)-2.529(14)         | 2.515                      |
| 3(Sm <sup>III</sup> ) <sub>62</sub> | 2.383(13)-2.471(15)         | 2.436                      |
| 4(Tb <sup>III</sup> ) <sub>65</sub> | 2.378(15)-2.429(16)         | 2.397                      |

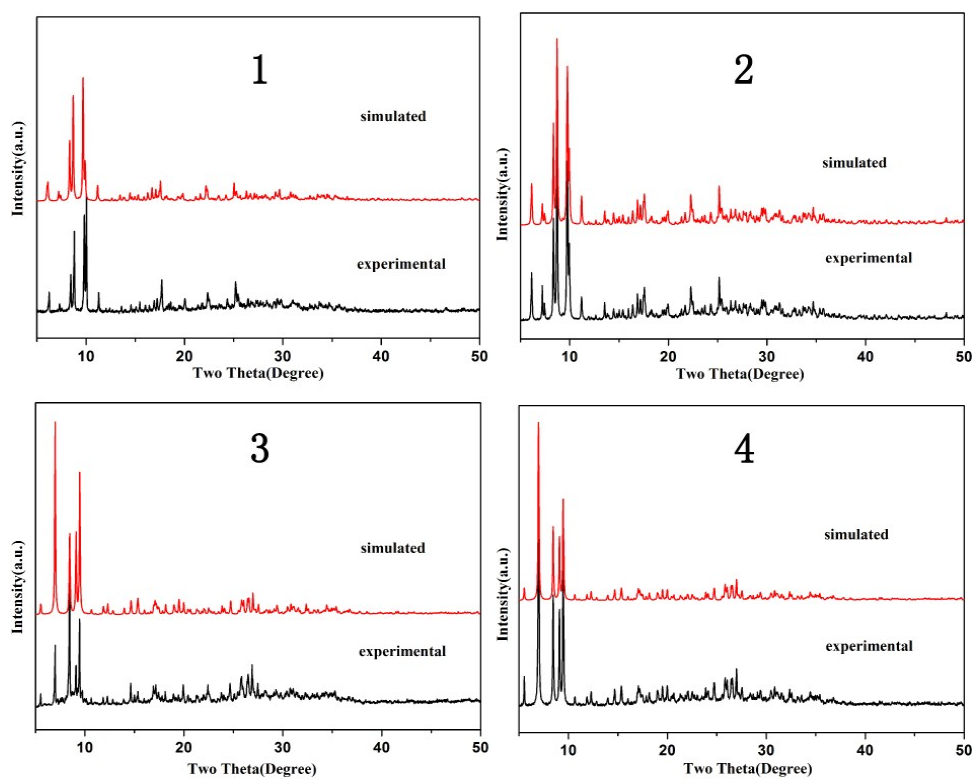**Figure S1** Comparison of the simulated and experimental PXRD patterns of **1–4**.

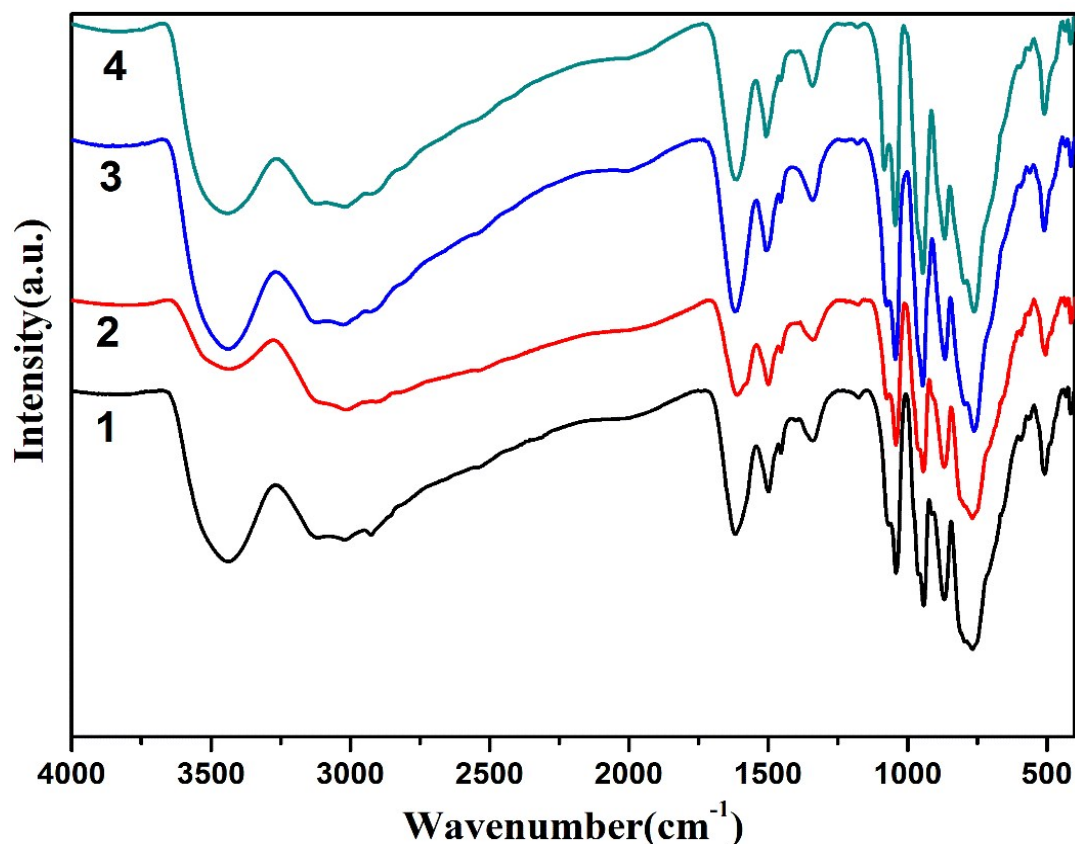

Figure S2 The IR spectrum of 1-4.

#### IR spectra.

The IR spectra of **1–4** were recorded with KBr pellets in the range of 4000–400  $\text{cm}^{-1}$  (Figure S2). In the low wavenumber region, IR spectra of **1–4** all exhibit the characteristic  $\nu_{\text{as}}(\text{P–O})$ , terminal  $\nu_{\text{as}}(\text{W–O}_{\text{t}})$ , corner-sharing  $\nu_{\text{as}}(\text{W–O}_{\text{b}})$  and edge-sharing  $\nu_{\text{as}}(\text{W–O}_{\text{c}})$  asymmetric vibration patterns resulting from the Keggin-type POM framework, which are observed at 1066, 1041; 960, 942; 912, 867 and 794, 766  $\text{cm}^{-1}$  for **1**, 1074, 1042; 963, 943; 868; 795, 767 for **2**, 1073, 1043; 945; 866; 794, 760 for **3**, 1083, 1044; 944; 867; 796, 760 for **4**, respectively. By a close examination of their IR spectra, some stretching vibration bands split into two bands as a consequence of the lower symmetry of the divacant poly-oxoanion fragments in **1–4** than those of the plenary Keggin POT clusters.<sup>1</sup> In contrast, IR spectra of **1–4** obviously differ from those of the trivacant Keggin polyoxoanion precursors,<sup>1,2</sup> which further confirm the structural transformations from  $[\alpha\text{-PW}_9\text{O}_{34}]^{9-}$  to  $[\alpha\text{-PW}_{10}\text{O}_{38}]^{9-}$  during the course of forming **1–4**. Moreover, the resonances appearing at 3436; 3437; 3436; 3437  $\text{cm}^{-1}$  and 3027; 3015; 3027; 3015  $\text{cm}^{-1}$  are attributable to the  $\nu(-\text{NH}_2)$  and  $\nu(-\text{CH}_2)$  stretching vibration while the signals at 1617; 1611; 1619; 1613  $\text{cm}^{-1}$  and 1454; 1454; 1455; 1455  $\text{cm}^{-1}$  are assigned to the  $\delta(-\text{NH}_2)$  and  $\delta(-\text{CH}_2)$  bending vibration, respectively. For **1–4**, the resonances at 1498, 1340; 1499, 1341; 1507, 1341; 1506, 1341  $\text{cm}^{-1}$  are attributed to the  $\nu_{\text{as}}(\text{C=O})$  and  $\nu_{\text{as}}(\text{C–O})$  stretching vibrations of acetate ligands, respectively.<sup>3</sup> The occurrence of these characteristic signals confirms the presence of en groups and Tart ligands in **1–4**. In addition, the vibration bands at 3436–3437  $\text{cm}^{-1}$  are indicative of the presence of lattice water molecules or coordination water molecules. In a word, the results of the IR spectra are in good agreement with those obtained from the X-ray single-crystal structural analyses.

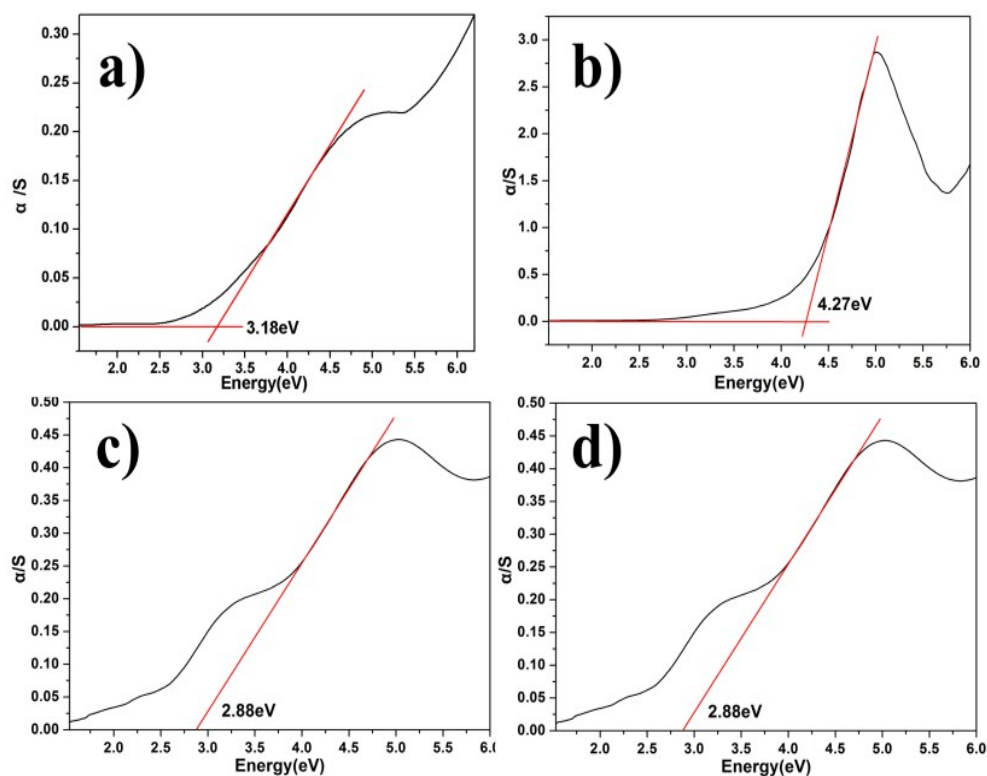

Figure S3 UV-Vis plots of Kubelka-Munk function versus energy  $E$  (eV) of **1** (a), **2** (b), **3** (c), **4** (d).

### UV spectra

To evaluate the optical properties of **1-4**, the measurements of diffuse reflectance spectra for powdered crystal samples were performed to obtain their band gaps ( $E_g$ ) (Figure S3). The band gap was determined as the intersection point between the energy axis and the line extrapolated from the linear portion of the absorption edge in a plot of the Kubelka–Munk function against the energy  $E$ .<sup>4,5</sup> Their band gaps  $E_g$  are 3.18, 4.27, 2.88 and 2.88 eV for **1-4**, respectively. These band gaps are related to the energy-level difference between the oxygen p-type HOMO and the tungsten p-type LUMO.<sup>6</sup> Similar behaviors have been observed in several reported TMSPs, such as  $[\{Ni_6(\mu_3-OH)_3(en)_2(H_2O)_8\}(PW_9O_{34})]$  ( $en$  = ethylenediamine),<sup>7</sup>  $[Ni_6(enMe)_3(\mu_3-OH)_3]_3(Ac)_2(H_2O)(P_2W_{15}O_{56})_2]$  ( $enMe$  = 1,2-diaminopropane).<sup>8</sup> The band gaps of the compounds decrease with increasing dimensionality or complexity of the structures, as pointed out by Kanatzidis and Papavassiliou.<sup>9-11</sup>

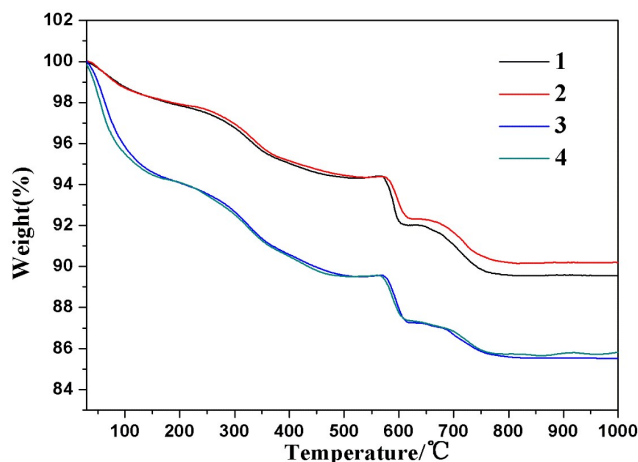

Figure S4 The TG curve of **1-4**.

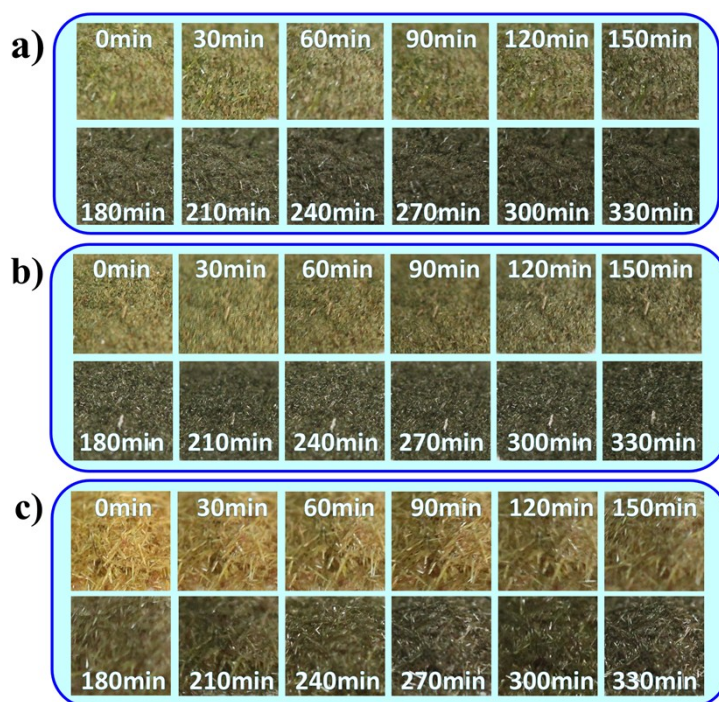

Figure S5 Coloration change of compound 1-3 after 0-330 min of UV irradiation with a 300 W xenon lamp,

1 (a), 2 (b), 3 (c).

### References:

- 1 A. P. Ginsberg, *Inorganic Syntheses*. New York: John Wiley. Sons 1990, **27**, 100.
- 2 J. W. Zhao, J. Luo, L. J. Chen, J. Yuan, H. Y. Li, P. T. Ma, J. P. Wang and J. Y. Niu, *CrystEngComm*, 2012, **14**, 7981.
- 3 J. Y. Niu, K. H. Wang, H. N. Chen, J. W. Zhao, P. T. Ma, J. P. Wang, M. X. Li, Y. Bai and D. B. Dang, *Cryst. Growth Des.*, 2009, **9**, 4362.
- 4 W. M. Wesley and W. G. H. Harry, *Reflectance Spectroscopy*, Wiley ( New York, 1966).
- 5 J. I. Pankove, *Optical Processes in Semiconductors*, Prentice-Hall ( New York, 1997).
- 6 Y. Xia, P. Wu, Y. Wei, Y. Wang and H. Guo, *Cryst. Grow. Des.*, 2006, **6**, 253.
- 7 J. W. Zhao, H. P. Jia, J. Zhang, S. T. Zheng and G. Y. Yang, *Chem. -Eur. J.* 2007, **13**, 10030.
- 8 X. X. Li, W. H. Fang, J. W. Zhao and G. Y. Yang, *Chem. Eur. J.* 2014, **20**, 17324.
- 9 E. A. Axtell, Y. Park, K. Chondroudis and M. G. Kanatzidis, *J. Am. Chem. Soc.*, 1998, **120**, 124.
- 10 G. C. Papavassiliou, *Prog Solid. State. Chem.* 1997, **25**, 125.
- 11 T. Yamase, *Chem. Rev.*, 1998, **98**, 307.
